# Supplementary material for: [Feasibility and acceptance of video-based physiotherapy : New medical care provision for older people during the COVID-19 pandemic].
Source: Springer Nature journal article supplement (doi:10.1007/s00391-021-01899-3), 2021-07-01
Supplement: MOESM3 [file 19128770]

## Kalorienverbrauch der Freizeitaktivitäten (adaptierte Version des Minnesota Leisure Time Physical Activity Questionnaire)

| Freizeitaktivität         | Intensitäts-Code (I) | Gesamtdauer D [min] | I x D [kcal] |
|---------------------------|----------------------|---------------------|--------------|
|                           |                      |                     |              |
| Spaziergehen              | 3,5                  |                     |              |
| Rasen mähen               | 6,0                  |                     |              |
| Gartenarbeit              | 4,5                  |                     |              |
| Wandern                   | 6,0                  |                     |              |
| Fahrradfahren (draußen)   | 4,0                  |                     |              |
| Fahrradfahren (Ergometer) | 4,0                  |                     |              |
| Tanzen                    | 5,5                  |                     |              |
| Joggen/Walking            | 6,0                  |                     |              |
| Schwimmen                 | 6,0                  |                     |              |
| Segeln                    | 3,0                  |                     |              |
| Tennis                    | 8,0                  |                     |              |
| Badminton                 | 7,0                  |                     |              |
| Golf zu Fuß, ziehend      | 5,0                  |                     |              |
| Sonstiges:<br>_____       |                      |                     |              |

**Summe Energieverbrauch I x D**

Energieverbrauch pro Woche:  $\sum (I \times D) / 2$ : \_\_\_\_\_ kcal/Woche
