# Supplementary material for: Feasibility and acceptance of video-based physiotherapy: New medical care provision for older people during the COVID-19 pandemic
Source: Z Gerontol Geriatr. 2021 Apr 30;54(4):346–52. [Article in German] doi: 10.1007/s00391-021-01899-3 (PMC8090529; doi:10.1007/s00391-021-01899-3)
Supplement: Supplementary file 1 [file 391_2021_1899_MOESM1_ESM.pdf]

|                                                                                       |                                    |                    |                                         |                         |                              |
|---------------------------------------------------------------------------------------|------------------------------------|--------------------|-----------------------------------------|-------------------------|------------------------------|
| <b>Körperregion, die behandelt wurde</b> (bitte ankreuzen)                            | Ganzer Körper                      |                    |                                         |                         |                              |
|                                                                                       | Oberkörper inkl. Schulter/Arme/HWS |                    |                                         |                         |                              |
|                                                                                       | Untere Extremitäten, Hüfte, LWS    |                    |                                         |                         |                              |
| <b>Diagnosegruppe</b> (bitte ankreuzen)                                               | Neurologie                         |                    |                                         |                         |                              |
|                                                                                       | Orthopädie                         |                    |                                         |                         |                              |
|                                                                                       | Pneumologie                        |                    |                                         |                         |                              |
|                                                                                       | Kardiologie                        |                    |                                         |                         |                              |
|                                                                                       | Sonstiges:                         |                    |                                         |                         |                              |
|                                                                                       |                                    |                    |                                         |                         |                              |
|                                                                                       | <b>1<br/>(sehr gut)</b>            | <b>2<br/>(gut)</b> | <b>3<br/>(teils gut/teils schlecht)</b> | <b>4<br/>(schlecht)</b> | <b>5<br/>(sehr schlecht)</b> |
| Wie fanden Sie die Videotherapie insgesamt?                                           |                                    |                    |                                         |                         |                              |
| Wie war die Video-Qualität?                                                           |                                    |                    |                                         |                         |                              |
| Wie konnten Sie ihren Therapeuten verstehen?                                          |                                    |                    |                                         |                         |                              |
| Konnten Sie den Anweisungen des Therapeuten folgen?                                   |                                    |                    |                                         |                         |                              |
| Konnten Sie die geforderten Übungen ausführen?                                        |                                    |                    |                                         |                         |                              |
| Wie war die Bedienung des Tablets?                                                    |                                    |                    |                                         |                         |                              |
| Wie war die Sicherheit während der Physiotherapie?                                    |                                    |                    |                                         |                         |                              |
|                                                                                       |                                    |                    |                                         |                         |                              |
|                                                                                       | Ja                                 |                    | Nein                                    |                         |                              |
| Würden Sie Videotherapie als Alternative während der Corona-Krise annehmen?           |                                    |                    |                                         |                         |                              |
| Ist die Videotherapie für Sie zukünftig eine Alternative zur normalen Physiotherapie? |                                    |                    |                                         |                         |                              |
| Haben Sie sich durch die Video-Therapie mehr bewegt als ohne?                         |                                    |                    |                                         |                         |                              |
| Haben Sie die Therapie vorzeitig abgebrochen?                                         |                                    |                    |                                         |                         |                              |
|                                                                                       |                                    |                    |                                         |                         |                              |

**Bei Therapieabbruch: welcher Grund hat dazu geführt?**

**Zusätzliche Kommentare:**
