# Supplementary material for: Feasibility and acceptance of video-based physiotherapy: New medical care provision for older people during the COVID-19 pandemic
Source: Z Gerontol Geriatr. 2021 Apr 30;54(4):346–52. [Article in German] doi: 10.1007/s00391-021-01899-3 (PMC8090529; doi:10.1007/s00391-021-01899-3)
Supplement: Supplementary file 2 [file 391_2021_1899_MOESM2_ESM.pdf]

**Bitte geben Sie uns abschließend eine generelle Einschätzung der Videotherapie**

|                                                                                             |                                                                                                                                       |                    |                                         |                         |                              |
|---------------------------------------------------------------------------------------------|---------------------------------------------------------------------------------------------------------------------------------------|--------------------|-----------------------------------------|-------------------------|------------------------------|
| <b>Datum</b>                                                                                |                                                                                                                                       |                    |                                         |                         |                              |
| <b>Wie viele Videotherapien haben Sie insgesamt durchgeführt innerhalb der Studie?</b>      | Anzahl Therapien:<br>Abgebrochene Verordnungen:                                                                                       |                    |                                         |                         |                              |
| <b>Welche Art der Therapie wurde durchgeführt?</b><br>(mehrere Auswahlmöglichkeiten)        | Allgemeine Bewegungsübungen<br>Atemtherapie<br>Allg. Hockergymnastik<br>Balance-Übungen<br>Kräftigungsübungen<br>Sonstiges: _____     |                    |                                         |                         |                              |
| <b>Welche Hilfsmittel wurden vom Patienten verwendet?</b><br>(mehrere Auswahlmöglichkeiten) | Stuhl mit Armlehne:<br>Stuhl ohne Armlehne:<br>Hocker<br>Stab<br>Theraband<br>Wasserflasche<br>Hantel<br>Handtuch<br>Sonstiges: _____ |                    |                                         |                         |                              |
|                                                                                             |                                                                                                                                       |                    |                                         |                         |                              |
|                                                                                             | <b>1<br/>(sehr gut)</b>                                                                                                               | <b>2<br/>(gut)</b> | <b>3<br/>(teils gut/teils schlecht)</b> | <b>4<br/>(schlecht)</b> | <b>5<br/>(sehr schlecht)</b> |
| Wie war die Erfahrung mit der Videotherapie?                                                |                                                                                                                                       |                    |                                         |                         |                              |
| Wie war die Video-Qualität?                                                                 |                                                                                                                                       |                    |                                         |                         |                              |
| Wie konnten Sie ihre Patienten verstehen?                                                   |                                                                                                                                       |                    |                                         |                         |                              |
| Wie gut konnten die Patienten Sie verstehen?                                                |                                                                                                                                       |                    |                                         |                         |                              |
| Wie konnten die Patienten Ihren Anweisungen folgen?                                         |                                                                                                                                       |                    |                                         |                         |                              |
| Wie konnten die Patienten Ihrer Meinung nach das Tablet bedienen?                           |                                                                                                                                       |                    |                                         |                         |                              |
| Wie konnten Sie Ihren PC/Laptop während der Behandlung bedienen?                            |                                                                                                                                       |                    |                                         |                         |                              |

|                                                                                                      | Ja | Nein |
|------------------------------------------------------------------------------------------------------|----|------|
| Hatten Sie Angst, dass die Person während der Therapie stürzt?                                       |    |      |
| Ist die Videotherapie für Sie eine Alternative zur normalen Physiotherapie während der Corona-Krise? |    |      |
| Ist die Videotherapie für Sie eine Alternative zur normalen Physiotherapie?                          |    |      |
| Hatten Sie das Gefühl, dass der Aufwand größer als der Nutzen ist?                                   |    |      |
| <b>Zusätzliche Kommentare:</b>                                                                       |    |      |
|                                                                                                      |    |      |

## Feedback-Interview ConVideo Physiotherapeut\*innen

1. Wäre es aus Ihrer Sicht sinnvoll, Videotherapie in den Leistungskatalog aufzunehmen?  
Welche Vor- oder Nachteile sehen Sie?

2. Nach Ihren bisherigen Erfahrungen: Sehen Sie Unterstützungsbedarf bei der Umsetzung der Videotherapie?

Ich sehe Unterstützungsbedarf bei: (Mehrfachantworten möglich)

- ☐ Mir selbst
- ☐ Meinen Kolleg\*innen / Mitarbeiter\*innen
- ☐ in anderen Praxen
- ☐ kein Unterstützungsbedarf bei den oben genannten
- ☐ Sonstige: \_\_\_\_\_

Wobei sehen Sie Unterstützungsbedarf? (Mehrfachantworten möglich)

- ☐ PC-Kompetenz
- ☐ Software-Anwendung für die Videotherapie
- ☐ inhaltliche Aspekte bei der Durchführung einer Videotherapie
- ☐ Sonstige: \_\_\_\_\_

Bitte beschreiben Sie kurz, welche konkreten Maßnahmen Sie sich vorstellen könnten:

3. Wie schätzen Sie die generelle Bereitschaft Ihrer Patient\*innen zur Teilnahme an der Videotherapie ein? Was könnte Patient\*innen davon abhalten, Videotherapie zu nutzen?
